# Supplementary material
Source: publisher figshare collection journal article supplement (https://acs.figshare.com/ndownloader/files/4696078)
Supplement: Supplementary file 1 [file 4696078]

data_CRYSTALS_cif 
_audit_creation_date        06-01-19
_audit_creation_method CRYSTALS_ver_12.82

_oxford_structure_analysis_title  'import in P -1'
_chemical_name_systematic         ?
_chemical_melting_point           ?

_cell_length_a                    13.0941(2)
_cell_length_b                    15.2755(2)
_cell_length_c                    15.6275(2)
_cell_angle_alpha                 78.0950(10)
_cell_angle_beta                  89.2150(10)
_cell_angle_gamma                 82.6660(10)
_cell_volume                      3033.28(7)
 
_symmetry_cell_setting            'Triclinic' 
_symmetry_space_group_name_H-M    'P -1 ' 
_symmetry_space_group_name_Hall   '?' 
loop_
 _symmetry_equiv_pos_as_xyz
 'x,y,z'
 '-x,-y,-z'

loop_
_atom_type_symbol
_atom_type_scat_dispersion_real
_atom_type_scat_dispersion_imag
_atom_type_scat_Cromer_Mann_a1
_atom_type_scat_Cromer_Mann_b1
_atom_type_scat_Cromer_Mann_a2
_atom_type_scat_Cromer_Mann_b2
_atom_type_scat_Cromer_Mann_a3
_atom_type_scat_Cromer_Mann_b3
_atom_type_scat_Cromer_Mann_a4
_atom_type_scat_Cromer_Mann_b4
_atom_type_scat_Cromer_Mann_c
_atom_type_scat_source  
 C       0.0033   0.0016   2.3100  20.8439   1.0200  10.2075   1.5886   0.5687
   0.8650  51.6512   0.2156 'International Tables Vol C 4.2.6.8 and 6.1.1.4'
 H       0.0000   0.0000   0.4930  10.5109   0.3229  26.1257   0.1402   3.1424
   0.0408  57.7998   0.0030 'International Tables Vol C 4.2.6.8 and 6.1.1.4'
 N       0.0061   0.0033  12.2126   0.0057   3.1322   9.8933   2.0125  28.9975
   1.1663   0.5826 -11.5290 'International Tables Vol C 4.2.6.8 and 6.1.1.4'
 O       0.0106   0.0060   3.0485  13.2771   2.2868   5.7011   1.5463   0.3239
   0.8670  32.9089   0.2508 'International Tables Vol C 4.2.6.8 and 6.1.1.4'
 F       0.0171   0.0103   3.5392  10.2825   2.6412   4.2944   1.5170   0.2615
   1.0243  26.1476   0.2776 'International Tables Vol C 4.2.6.8 and 6.1.1.4'
 Cl      0.1484   0.1585  11.4604   0.0104   7.1964   1.1662   6.2556  18.5194
   1.6455  47.7784  -9.5574 'International Tables Vol C 4.2.6.8 and 6.1.1.4'
 Cu      0.3201   1.2651  13.3380   3.5828   7.1676   0.2470   5.6158  11.3966
   1.6735  64.8126   1.1910 'International Tables Vol C 4.2.6.8 and 6.1.1.4'
 Y      -2.7962   3.5667  17.7760   1.4029  10.2946  12.8006   5.7263   0.1256
   3.2659 104.3540   1.9121 'International Tables Vol C 4.2.6.8 and 6.1.1.4'
 
 
_cell_formula_units_Z                    2

# Given Formula = C42 H43 Cl1 Cu3 F27 N4 O12 Y1 
# Dc =      1.78 Fooo =   1610.00 Mu =     21.68 M =   1623.76
# Found Formula = C42 H43 Cl1 Cu3 F27 N4 O12 Y1 
# Dc =      1.78 FOOO =   1610.00 Mu =     21.68 M =   1623.77

_chemical_formula_sum             'C42 H43 Cl1 Cu3 F27 N4 O12 Y1'
_chemical_formula_moiety          'C42 H43 Cl1 Cu3 F27 N4 O12 Y1'
_chemical_compound_source                ?
_chemical_formula_weight           1623.77
 
 
_cell_measurement_reflns_used        11595
_cell_measurement_theta_min              1
_cell_measurement_theta_max             28
_cell_measurement_temperature          293
 
_exptl_crystal_description        'plate' 
_exptl_crystal_colour             'blue' 
_exptl_crystal_size_min           0.18 
_exptl_crystal_size_mid           0.24 
_exptl_crystal_size_max           0.27 
 
_exptl_crystal_density_diffrn     1.778 
_exptl_crystal_density_meas       ? 
# Non-dispersive F(000): 
_exptl_crystal_F_000              1610 
_exptl_absorpt_coefficient_mu     2.168 
 
# Sheldrick geometric approximatio 0.59 0.68 
_exptl_absorpt_correction_type    none 
_exptl_absorpt_correction_T_min   0.5943 
_exptl_absorpt_correction_T_max   0.6768 
_diffrn_measurement_device_type   'Nonius Kappa CCD' 
_diffrn_radiation_monochromator   'graphite' 
_diffrn_radiation_type            'Mo K\a'
_diffrn_radiation_wavelength           0.71073
_diffrn_measurement_method        \w/2\q 
 
_computing_data_collection        'COLLECT. Nonius (1997-2001).' 
_computing_data_reduction         'DENZO/SCALEPACK (Otwinowski & Minor, 1997)' 
_computing_cell_refinement        'DENZO/SCALEPACK (Otwinowski & Minor, 1997)' 
_computing_structure_solution     'SIR92 (Altomare et al., 1994)' 
_computing_structure_refinement   'CRYSTALS (Betteridge et al., 2003)' 
_computing_publication_material   'CRYSTALS (Betteridge et al., 2003)' 
_computing_molecular_graphics     'CAMERON (Watkin et al., 1996)' 
 
_diffrn_standards_interval_time   ? 
_diffrn_standards_interval_count  ? 
_diffrn_standards_number          0 
_diffrn_standards_decay_%         ? 
 
_diffrn_ambient_temperature        293
_diffrn_reflns_number             23445 
_reflns_number_total              14334 
_diffrn_reflns_av_R_equivalents   0.024 
# Number of reflections with Friedels Law is 14334 
# Number of reflections without Friedels Law is 0 
# Theoretical number of reflections is about 14402 
 
 
_diffrn_reflns_theta_min          1.332 
_diffrn_reflns_theta_max          27.839 
_diffrn_measured_fraction_theta_max 0.994 
 
_diffrn_reflns_theta_full         27.283 
_diffrn_measured_fraction_theta_full 0.997 
 
 
_diffrn_reflns_limit_h_min        -16 
_diffrn_reflns_limit_h_max        17 
_diffrn_reflns_limit_k_min        -17 
_diffrn_reflns_limit_k_max        20 
_diffrn_reflns_limit_l_min        -20 
_diffrn_reflns_limit_l_max        20 
_reflns_limit_h_min               -17 
_reflns_limit_h_max               17 
_reflns_limit_k_min               -19 
_reflns_limit_k_max               20 
_reflns_limit_l_min               0 
_reflns_limit_l_max               20 
 
_oxford_diffrn_Wilson_B_factor    0.00 
_oxford_diffrn_Wilson_scale       0.00 
 
_atom_sites_solution_primary      direct #heavy,direct,difmap,geom
# _atom_sites_solution_secondary  difmap
_atom_sites_solution_hydrogens    geom
 
_refine_diff_density_min          -0.61 
_refine_diff_density_max          0.91 
 
 
_refine_ls_number_reflns          9127 
_refine_ls_number_restraints      0 
_refine_ls_number_parameters      811 
 
#_refine_ls_R_factor_ref 0.0452 
_refine_ls_wR_factor_ref          0.0524 
_refine_ls_goodness_of_fit_ref    1.1014 
 
#_reflns_number_all 14299 
_refine_ls_R_factor_all           0.0824 
_refine_ls_wR_factor_all          0.0775 
 
# The I/u(I) cutoff below was used for refinement as 
# well as the _gt R-factors:
_reflns_threshold_expression      I>3.00u(I)
_reflns_number_gt                 9127 
_refine_ls_R_factor_gt            0.0452 
_refine_ls_wR_factor_gt           0.0524 
 
_refine_ls_shift/su_max           0.000243 
 
# choose from: rm (reference molecule of known chirality), 
# ad (anomolous dispersion - Flack), rmad (rm and ad), 
# syn (from synthesis), unk (unknown) or . (not applicable). 
_chemical_absolute_configuration  '.' 
 
 
_refine_ls_structure_factor_coef  F 
_refine_ls_matrix_type            full
_refine_ls_hydrogen_treatment     noref          # none, undef, noref, refall,
                                                 # refxyz, refU, constr or mixed
_refine_ls_weighting_scheme       calc 
_refine_ls_weighting_details 
;
 Method, part 1, Chebychev polynomial, (Watkin, 1994, Prince, 1982) 
 [weight] = 1.0/[A~0~*T~0~(x)+A~1~*T~1~(x) ... +A~n-1~]*T~n-1~(x)] 
 where A~i~ are the Chebychev coefficients listed below and x= Fcalc/Fmax 
 Method = Robust Weighting (Prince, 1982) 
 W = [weight] * [1-(deltaF/6*sigmaF)^2^]^2^ 
 A~i~ are: 
 0.894 0.392 0.556 
;
 
 
 
# Check this file using the IUCr facility at: 
# http://checkcif.iucr.org/ 
 
# The content below is held in the file 'script/refcif.dat'. This is a text 
# file which you may edit to reflect local conditions. 
# Items which need looking at are represented by a '?'. 
# Items for which there are choices are prefixed with 'choose from'. 
 
_publ_contact_letter 
; 
 Please consider this CIF submission for 
 publication as a Short Format Paper in Acta 
 Crystallographica E. The figures have been 
 sent by mail. 
; 
_publ_contact_author_name         'Anthony Other' 
_publ_contact_author_address 
; 
 Chemical Crystallography Laboratory, 
 Department of Chemistry, 
 University of Nowhere, 
 Nowhere, NO1 4T, UK. 
; 
 
_publ_contact_author_phone        '+44 1865 000000' 
_publ_contact_author_fax          '+44 1865 000000' 
_publ_contact_author_email        'a.n.other@chem.no.ac.uk' 
_publ_requested_journal           'Section C' 
_publ_requested_category          CO # choose from: FI FM FO CI CM CO AD 
_publ_requested_coeditor_name     'Prof William Clegg' 
 
_publ_section_title               # Title of paper 
; ? 
; 
 
# The loop structure below should contain the names and addresses of all 
# authors, in the required order of publication. Repeat as necessary. 
loop_ 
 _publ_author_name 
 _publ_author_address 
 _publ_author_footnote 
 'Other, Anthony N.' # Author 1 
; 
 ? # Address for author 1 
; 
; 
 ? # Footnote for author 1 
; 
 'Else, S. O.' # Author 2 
; 
 ? # Address 2 
; 
; 
 ? # Footnote 2 
; 
 
 
_publ_section_abstract            # Text of the abstract 
; ? 
; 
_publ_section_comment             # Text of the paper 
; ? 
; 
_publ_section_acknowledgements    # Acknowledgments 
; ? 
; 
_publ_section_figure_captions     # Captions to figures 
; ? 
; 
 
_publ_section_exptl_refinement    # Some potentially useful phrases are: 
; 
Because the data were collected with molybdenum radiation, there were no 
measurable anomalous differences, as a consequence of which it was 
admissible to merge Friedel pairs of reflections. 
 
All hydrogen atoms were found in difference density syntheses. 
 
Hydrogen atoms were placed geometrically after each cycle. 
 
Hydrogen atoms were placed geometrically after each cycle, the preferred 
orientations of those groups whose conformations could not be assigned 
unambiguously having been previously identified by examination of a 
difference Fourier map. 
 
Hydrogen atoms were seen in a difference density synthesis. Those 
attached to carbon atoms were repositioned geometrically. 
 
Hydrogen were initially refined with soft restraints on the 
bonds to regularise their geometry (bond lengths to accepted values, 
angles either set by symmetry or to accepted values, and 
U[iso] dependent upon the adjacent bonded atom), 
after which they were refined with riding constraints only. 
 
 
donated by Bill Clegg: 
 
The H atoms were all located in a difference map, but those 
attached to carbon atoms were repositioned geometrically. 
The H atoms were initially refined with soft restraints on the 
bond lengths and angles to regularise their geometry (C---H in the range 
0.93-98, O---N in the range 0.86-0.89 and O---H = 0.82 \%A) and isotropic adps 
(U(H) in the range 1.2-1.5 times U~equiv~ of the adjacent atom), 
after which they were refined with riding constraints. 
. 
; 
 
_publ_section_exptl_prep 
; ? 
; 
 
 
# PROCESSING SUMMARY (IUCr Office Use Only): 
_journal_date_recd_electronic     ? 
_journal_date_to_coeditor         ? 
_journal_date_from_coeditor       ? 
_journal_date_accepted            ? 
_journal_date_printers_first      ? 
_journal_date_printers_final      ? 
_journal_date_proofs_out          ? 
_journal_date_proofs_in           ? 
_journal_coeditor_name            ? 
_journal_coeditor_code            ? 
_journal_coeditor_notes           ? 
_journal_techeditor_code          ? 
_journal_techeditor_notes         ? 
_journal_coden_ASTM               ? 
_journal_name_full                ? 
_journal_year                     ? 
_journal_volume                   ? 
_journal_issue                    ? 
_journal_page_first               ? 
_journal_page_last                ? 
_journal_suppl_publ_number        ? 
_journal_suppl_publ_pages         ? 
 
# End of 'script/refcif.dat' 
 
 
 
# Insert your own references if required - in alphabetical order 
_publ_section_references 
; 
Altomare, A., Cascarano, G., Giacovazzo G., Guagliardi A., Burla M.C., 
Polidori, G. & Camalli, M. (1994). J. Appl. Cryst. (27), 435-435 
 
Betteridge, P.W., Carruthers, J.R., Cooper, R.I., 
Prout, K., & Watkin, D.J. (2003). J. Appl. Cryst. 36, 1487. 
 
Nonius (1997-2001). COLLECT. Nonius BV, Delft, The Netherlands. 
 
Otwinowski, Z. & Minor, W. (1997). Methods in Enzymology, Vol. 276, 
edited by C. W. Carter Jr & R. M. Sweet, pp. 307--326. 
New York: Academic Press. 
 
Prince, E. 
Mathematical Techniques in Crystallography 
and Materials Science 
Springer-Verlag, New York, 1982. 
 
Watkin D.J. (1994). 
Acta Cryst, A50, 411-437 
 
Watkin, D.J., Prout, C.K. & Pearce, L.J. (1996). CAMERON, Chemical 
Crystallography Laboratory, OXFORD, UK. 
; 

# Uequiv = arithmetic mean of Ui i.e. Ueqiv = (U1+U2+U3)/3

# Replace last . with number of unfound hydrogen atomsattached to an atom.

# ..._refinement_flags_... 
# . no refinement constraints           S special position constraint on site
# G rigid group refinement of site      R riding atom
# D distance or angle restraint on site T thermal displacement constraints
# U Uiso or Uij restraint (rigid bond)  P partial occupancy constraint


loop_
_atom_site_label
_atom_site_type_symbol
_atom_site_fract_x
_atom_site_fract_y
_atom_site_fract_z
_atom_site_U_iso_or_equiv
_atom_site_occupancy
_atom_site_adp_type
_atom_site_refinement_flags_posn
_atom_site_refinement_flags_adp
_atom_site_refinement_flags_occupancy
_atom_site_disorder_assembly
_atom_site_disorder_group
_atom_site_attached_hydrogens
Y1 Y 0.24741(3) 0.30689(2) 0.27135(2) 0.0239 1.0000 Uani . . . . . . 
Cu1 Cu 0.22909(4) 0.10399(3) 0.23124(3) 0.0237 1.0000 Uani . . . . . . 
Cu2 Cu 0.29378(4) 0.27349(3) 0.06767(3) 0.0219 1.0000 Uani . . . . . . 
Cu3 Cu 0.46393(4) 0.17775(3) 0.22528(3) 0.0253 1.0000 Uani . . . . . . 
Cl1 Cl 0.38222(7) 0.09674(6) 0.10541(6) 0.0267 1.0000 Uani . . . . . . 
O10 O 0.1956(2) 0.23030(17) 0.16222(17) 0.0224 1.0000 Uani . . . . . . 
C11 C 0.0941(3) 0.2542(3) 0.1217(3) 0.0281 1.0000 Uani . . . . . . 
C12 C 0.0981(3) 0.2301(3) 0.0321(3) 0.0277 1.0000 Uani . . . . . . 
N13 N 0.1860(3) 0.2664(2) -0.0140(2) 0.0259 1.0000 Uani . . . . . . 
C14 C 0.1881(4) 0.2891(3) -0.0984(3) 0.0308 1.0000 Uani . . . . . . 
C15 C 0.0982(4) 0.2787(4) -0.1543(3) 0.0468 1.0000 Uani . . . . . . 
C16 C 0.2733(4) 0.3274(3) -0.1430(3) 0.0325 1.0000 Uani . . . . . . 
C17 C 0.3576(4) 0.3445(3) -0.1025(3) 0.0302 1.0000 Uani . . . . . . 
O18 O 0.3820(2) 0.3263(2) -0.02067(18) 0.0316 1.0000 Uani . . . . . . 
C19 C 0.4363(4) 0.3965(3) -0.1586(3) 0.0385 1.0000 Uani . . . . . . 
F20 F 0.5323(2) 0.3631(2) -0.1353(2) 0.0597 1.0000 Uani . . . . . . 
F21 F 0.4289(3) 0.3965(3) -0.2432(2) 0.0734 1.0000 Uani . . . . . . 
F22 F 0.4237(3) 0.4816(2) -0.1503(3) 0.0771 1.0000 Uani . . . . . . 
O30 O 0.3340(2) 0.15384(18) 0.29062(17) 0.0245 1.0000 Uani . . . . . . 
C31 C 0.3486(3) 0.0984(3) 0.3773(3) 0.0299 1.0000 Uani . . . . . . 
C32 C 0.3520(4) 0.0001(3) 0.3714(3) 0.0334 1.0000 Uani . . . . . . 
N33 N 0.2616(3) -0.0065(2) 0.3187(2) 0.0285 1.0000 Uani . . . . . . 
C34 C 0.2130(4) -0.0768(3) 0.3334(3) 0.0312 1.0000 Uani . . . . . . 
C35 C 0.2514(4) -0.1594(3) 0.4025(3) 0.0448 1.0000 Uani . . . . . . 
C36 C 0.1211(4) -0.0791(3) 0.2856(3) 0.0351 1.0000 Uani . . . . . . 
C37 C 0.0819(3) -0.0126(3) 0.2197(3) 0.0301 1.0000 Uani . . . . . . 
O38 O 0.1174(2) 0.0609(2) 0.1827(2) 0.0334 1.0000 Uani . . . . . . 
C39 C -0.0199(4) -0.0202(3) 0.1766(3) 0.0395 1.0000 Uani . . . . . . 
F40 F -0.0047(2) -0.0380(3) 0.0959(2) 0.0584 1.0000 Uani . . . . . . 
F41 F -0.0843(2) 0.0554(2) 0.1660(3) 0.0641 1.0000 Uani . . . . . . 
F42 F -0.0690(3) -0.0862(2) 0.2206(2) 0.0615 1.0000 Uani . . . . . . 
O50 O 0.3823(2) 0.29028(17) 0.16436(17) 0.0225 1.0000 Uani . . . . . . 
C51 C 0.4493(3) 0.3600(3) 0.1449(3) 0.0266 1.0000 Uani . . . . . . 
C52 C 0.5544(3) 0.3191(3) 0.1203(3) 0.0322 1.0000 Uani . . . . . . 
N53 N 0.5847(3) 0.2345(2) 0.1831(2) 0.0285 1.0000 Uani . . . . . . 
C54 C 0.6786(3) 0.2078(3) 0.2115(3) 0.0338 1.0000 Uani . . . . . . 
C55 C 0.7637(4) 0.2651(4) 0.1840(4) 0.0529 1.0000 Uani . . . . . . 
C56 C 0.7065(3) 0.1223(3) 0.2701(3) 0.0370 1.0000 Uani . . . . . . 
C57 C 0.6400(3) 0.0627(3) 0.2988(3) 0.0332 1.0000 Uani . . . . . . 
O58 O 0.5419(2) 0.0689(2) 0.2834(2) 0.0385 1.0000 Uani . . . . . . 
C59 C 0.6777(4) -0.0279(4) 0.3576(3) 0.0469 1.0000 Uani . . . . . . 
F60 F 0.7752(3) -0.0361(3) 0.3823(3) 0.0985 1.0000 Uani . . . . . . 
F61 F 0.6694(3) -0.0963(2) 0.3174(2) 0.0724 1.0000 Uani . . . . . . 
F62 F 0.6212(3) -0.0450(3) 0.4280(2) 0.0766 1.0000 Uani . . . . . . 
O70 O 0.2161(2) 0.41365(18) 0.13485(19) 0.0290 1.0000 Uani . . . . . . 
C71 C 0.1947(4) 0.4973(3) 0.1142(3) 0.0357 1.0000 Uani . . . . . . 
C72 C 0.2003(4) 0.5596(3) 0.1674(4) 0.0462 1.0000 Uani . . . . . . 
C73 C 0.2384(5) 0.5313(3) 0.2519(4) 0.0487 1.0000 Uani . . . . . . 
O74 O 0.2702(3) 0.4527(2) 0.2913(2) 0.0411 1.0000 Uani . . . . . . 
C75 C 0.1674(4) 0.5336(3) 0.0184(4) 0.0452 1.0000 Uani . . . . . . 
F76 F 0.1112(4) 0.4816(3) -0.0136(3) 0.0869 1.0000 Uani . . . . . . 
F77 F 0.1178(3) 0.6165(2) 0.0004(2) 0.0666 1.0000 Uani . . . . . . 
F78 F 0.2514(3) 0.5333(3) -0.0305(2) 0.0830 1.0000 Uani . . . . . . 
C79 C 0.2453(8) 0.6035(4) 0.3055(5) 0.0761 1.0000 Uani . . . . . . 
F80 F 0.2062(6) 0.5879(4) 0.3790(4) 0.1487 1.0000 Uani . . . . . . 
F81 F 0.3428(6) 0.6030(5) 0.3295(5) 0.1607 1.0000 Uani . . . . . . 
F82 F 0.2219(10) 0.6826(3) 0.2658(5) 0.2289 1.0000 Uani . . . . . . 
O90 O 0.0794(3) 0.3844(2) 0.2697(2) 0.0357 1.0000 Uani . . . . . . 
C91 C -0.0014(4) 0.3698(3) 0.3086(3) 0.0403 1.0000 Uani . . . . . . 
C92 C -0.0257(4) 0.2890(3) 0.3611(4) 0.0446 1.0000 Uani . . . . . . 
C93 C 0.0440(4) 0.2107(3) 0.3673(3) 0.0374 1.0000 Uani . . . . . . 
O94 O 0.1300(2) 0.20091(19) 0.33302(19) 0.0306 1.0000 Uani . . . . . . 
C95 C 0.0090(4) 0.1234(3) 0.4201(4) 0.0439 1.0000 Uani . . . . . . 
F96 F 0.0853(3) 0.0624(3) 0.4514(3) 0.0839 1.0000 Uani . . . . . . 
F97 F -0.0366(4) 0.0824(3) 0.3675(4) 0.1099 1.0000 Uani . . . . . . 
F98 F -0.0535(6) 0.1345(3) 0.4804(4) 0.1582 1.0000 Uani . . . . . . 
C99 C -0.0847(5) 0.4522(4) 0.2931(4) 0.0584 1.0000 Uani . . . . . . 
F100 F -0.0498(3) 0.5241(2) 0.3089(3) 0.0795 1.0000 Uani . . . . . . 
F101 F -0.1167(4) 0.4713(4) 0.2109(3) 0.1103 1.0000 Uani . . . . . . 
F102 F -0.1663(3) 0.4399(3) 0.3424(4) 0.1101 1.0000 Uani . . . . . . 
O110 O 0.2202(3) 0.3057(2) 0.4204(2) 0.0428 1.0000 Uani . . . . . . 
C111 C 0.2692(5) 0.3222(4) 0.4807(3) 0.0527 1.0000 Uani . . . . . . 
C112 C 0.3743(5) 0.3293(4) 0.4825(4) 0.0587 1.0000 Uani . . . . . . 
C113 C 0.4365(4) 0.3151(3) 0.4118(3) 0.0457 1.0000 Uani . . . . . . 
O114 O 0.4094(3) 0.2973(2) 0.34117(19) 0.0359 1.0000 Uani . . . . . . 
C115 C 0.2045(7) 0.3361(6) 0.5598(4) 0.0815 1.0000 Uani . . . . . . 
F116 F 0.1298(5) 0.4010(5) 0.5382(3) 0.1320 1.0000 Uani . . . . . . 
F117 F 0.1594(5) 0.2628(5) 0.5922(3) 0.1314 1.0000 Uani . . . . . . 
F118 F 0.2555(5) 0.3516(6) 0.6241(3) 0.1568 1.0000 Uani . . . . . . 
C119 C 0.5550(6) 0.3170(5) 0.4170(5) 0.0671 1.0000 Uani . . . . . . 
F120 F 0.6024(4) 0.2365(4) 0.4171(4) 0.1132 1.0000 Uani . . . . . . 
F121 F 0.5825(3) 0.3405(3) 0.4895(3) 0.0920 1.0000 Uani . . . . . . 
F122 F 0.5859(4) 0.3717(5) 0.3486(3) 0.1133 1.0000 Uani . . . . . . 
N130 N 0.3450(3) -0.0737(3) 0.0415(3) 0.0369 1.0000 Uani . . . . . . 
C131 C 0.2427(4) -0.0984(4) 0.0776(4) 0.0545 1.0000 Uani . . . . . . 
C132 C 0.2115(6) -0.1806(5) 0.0518(7) 0.0865 1.0000 Uani . . . . . . 
C133 C 0.3458(4) -0.0466(4) -0.0579(4) 0.0474 1.0000 Uani . . . . . . 
C134 C 0.2805(5) 0.0418(5) -0.0914(4) 0.0597 1.0000 Uani . . . . . . 
C135 C 0.4352(4) -0.1421(4) 0.0756(4) 0.0486 1.0000 Uani . . . . . . 
C136 C 0.4470(6) -0.1570(4) 0.1741(4) 0.0664 1.0000 Uani . . . . . . 
H1321 H 0.1502 -0.1982 0.0865 0.1991 1.0000 Uiso . . . . . . 
H1322 H 0.2709 -0.2364 0.0917 0.1991 1.0000 Uiso . . . . . . 
H1323 H 0.2176 -0.1848 -0.0010 0.1991 1.0000 Uiso . . . . . . 
H1361 H 0.5189 -0.1942 0.1982 0.1723 1.0000 Uiso . . . . . . 
H1362 H 0.4713 -0.0906 0.1902 0.1723 1.0000 Uiso . . . . . . 
H1363 H 0.3971 -0.1691 0.2104 0.1723 1.0000 Uiso . . . . . . 
H1341 H 0.2834 0.0475 -0.1525 0.1598 1.0000 Uiso . . . . . . 
H1342 H 0.3066 0.0824 -0.0636 0.1598 1.0000 Uiso . . . . . . 
H1343 H 0.2110 0.0255 -0.0688 0.1598 1.0000 Uiso . . . . . . 
H1331 H 0.4209 -0.0430 -0.0742 0.1478 1.0000 Uiso . . . . . . 
H1332 H 0.3253 -0.1000 -0.0794 0.1478 1.0000 Uiso . . . . . . 
H1351 H 0.5009 -0.1225 0.0471 0.1481 1.0000 Uiso . . . . . . 
H1352 H 0.4267 -0.2010 0.0673 0.1481 1.0000 Uiso . . . . . . 
H1311 H 0.2472 -0.0987 0.1461 0.1561 1.0000 Uiso . . . . . . 
H1312 H 0.1939 -0.0471 0.0534 0.1561 1.0000 Uiso . . . . . . 
H1301 H 0.3635 -0.0211 0.0678 0.1086 1.0000 Uiso . . . . . . 
H311 H 0.4192 0.1109 0.4045 0.0736 1.0000 Uiso . . . . . . 
H312 H 0.2964 0.1177 0.4182 0.0736 1.0000 Uiso . . . . . . 
H321 H 0.3506 -0.0353 0.4302 0.0811 1.0000 Uiso . . . . . . 
H322 H 0.4177 -0.0167 0.3428 0.0811 1.0000 Uiso . . . . . . 
H351 H 0.3106 -0.1417 0.4332 0.1044 1.0000 Uiso . . . . . . 
H352 H 0.1920 -0.1600 0.4471 0.1044 1.0000 Uiso . . . . . . 
H353 H 0.2604 -0.2057 0.3777 0.1044 1.0000 Uiso . . . . . . 
H361 H 0.0840 -0.1278 0.2975 0.0898 1.0000 Uiso . . . . . . 
H111 H 0.0747 0.3203 0.1203 0.0764 1.0000 Uiso . . . . . . 
H112 H 0.0449 0.2217 0.1627 0.0764 1.0000 Uiso . . . . . . 
H121 H 0.0335 0.2559 0.0017 0.0769 1.0000 Uiso . . . . . . 
H122 H 0.1064 0.1641 0.0412 0.0769 1.0000 Uiso . . . . . . 
H151 H 0.0447 0.2509 -0.1132 0.1180 1.0000 Uiso . . . . . . 
H152 H 0.0681 0.3376 -0.1847 0.1180 1.0000 Uiso . . . . . . 
H153 H 0.1230 0.2390 -0.1914 0.1180 1.0000 Uiso . . . . . . 
H161 H 0.2673 0.3468 -0.2023 0.0816 1.0000 Uiso . . . . . . 
H511 H 0.4591 0.3865 0.2031 0.0738 1.0000 Uiso . . . . . . 
H512 H 0.4186 0.4102 0.1021 0.0738 1.0000 Uiso . . . . . . 
H521 H 0.6051 0.3637 0.1226 0.0817 1.0000 Uiso . . . . . . 
H522 H 0.5470 0.3093 0.0619 0.0817 1.0000 Uiso . . . . . . 
H551 H 0.7329 0.3225 0.1405 0.1185 1.0000 Uiso . . . . . . 
H552 H 0.7969 0.2810 0.2311 0.1185 1.0000 Uiso . . . . . . 
H553 H 0.8139 0.2331 0.1475 0.1185 1.0000 Uiso . . . . . . 
H561 H 0.7794 0.1080 0.2839 0.0879 1.0000 Uiso . . . . . . 
H1121 H 0.4137 0.3439 0.5381 0.1739 1.0000 Uiso . . . . . . 
H721 H 0.1932 0.6242 0.1541 0.1172 1.0000 Uiso . . . . . . 
H921 H -0.0864 0.2878 0.3953 0.1196 1.0000 Uiso . . . . . . 
loop_
_atom_site_aniso_label
_atom_site_aniso_U_11
_atom_site_aniso_U_22
_atom_site_aniso_U_33
_atom_site_aniso_U_23
_atom_site_aniso_U_13
_atom_site_aniso_U_12
Y1 0.0321(2) 0.01947(17) 0.01996(18) -0.00454(13) 0.00258(15) -0.00206(14) 
Cu1 0.0276(2) 0.0187(2) 0.0235(2) -0.00084(17) -0.00079(18) -0.00425(18) 
Cu2 0.0241(2) 0.0228(2) 0.0185(2) -0.00254(17) -0.00045(17) -0.00529(18) 
Cu3 0.0244(2) 0.0232(2) 0.0265(2) -0.00131(18) -0.00187(19) -0.00260(18) 
Cl1 0.0283(5) 0.0250(4) 0.0285(5) -0.0099(3) 0.0018(4) -0.0030(4) 
O10 0.0259(14) 0.0185(12) 0.0221(13) -0.0026(10) -0.0008(10) -0.0025(10) 
C11 0.0223(19) 0.0280(19) 0.032(2) -0.0023(16) -0.0016(16) -0.0005(15) 
C12 0.027(2) 0.030(2) 0.0257(19) -0.0043(15) -0.0026(15) -0.0042(16) 
N13 0.0296(17) 0.0231(15) 0.0243(16) -0.0034(12) -0.0020(13) -0.0026(13) 
C14 0.041(2) 0.0242(18) 0.027(2) -0.0033(15) -0.0088(17) -0.0030(17) 
C15 0.055(3) 0.056(3) 0.032(2) -0.005(2) -0.014(2) -0.022(3) 
C16 0.043(2) 0.032(2) 0.0214(19) -0.0058(16) 0.0021(17) -0.0035(18) 
C17 0.042(2) 0.0208(18) 0.027(2) -0.0027(15) 0.0028(17) -0.0034(17) 
O18 0.0356(16) 0.0369(16) 0.0233(14) -0.0037(12) 0.0025(12) -0.0127(13) 
C19 0.046(3) 0.034(2) 0.034(2) -0.0011(18) 0.011(2) -0.010(2) 
F20 0.0460(18) 0.066(2) 0.060(2) 0.0075(16) 0.0136(15) -0.0174(16) 
F21 0.089(3) 0.106(3) 0.0290(15) -0.0015(17) 0.0150(16) -0.048(2) 
F22 0.094(3) 0.0346(16) 0.108(3) -0.0197(18) 0.053(2) -0.0285(18) 
O30 0.0307(14) 0.0234(13) 0.0180(12) -0.0012(10) 0.0004(10) -0.0035(11) 
C31 0.042(2) 0.0258(19) 0.0194(18) 0.0009(15) -0.0014(16) -0.0026(17) 
C32 0.042(2) 0.0254(19) 0.029(2) 0.0023(16) -0.0034(18) -0.0019(17) 
N33 0.0346(19) 0.0226(16) 0.0268(17) -0.0018(13) 0.0027(14) -0.0031(14) 
C34 0.038(2) 0.0262(19) 0.026(2) -0.0008(16) 0.0093(17) -0.0027(17) 
C35 0.063(3) 0.028(2) 0.039(3) 0.0059(19) -0.002(2) -0.012(2) 
C36 0.042(3) 0.028(2) 0.036(2) -0.0041(17) 0.0083(19) -0.0132(18) 
C37 0.028(2) 0.029(2) 0.035(2) -0.0065(16) 0.0064(17) -0.0085(16) 
O38 0.0344(16) 0.0283(15) 0.0359(16) 0.0022(12) -0.0060(13) -0.0115(12) 
C39 0.040(3) 0.034(2) 0.046(3) -0.007(2) -0.001(2) -0.014(2) 
F40 0.0440(17) 0.088(3) 0.0496(18) -0.0226(17) -0.0007(14) -0.0196(17) 
F41 0.0349(16) 0.0509(18) 0.110(3) -0.0259(19) -0.0109(17) 0.0001(14) 
F42 0.0537(19) 0.067(2) 0.066(2) 0.0015(17) -0.0027(16) -0.0402(17) 
O50 0.0266(14) 0.0198(12) 0.0222(13) -0.0049(10) -0.0006(10) -0.0056(10) 
C51 0.030(2) 0.0233(18) 0.0287(19) -0.0056(15) -0.0026(16) -0.0103(15) 
C52 0.030(2) 0.029(2) 0.038(2) -0.0035(17) 0.0026(18) -0.0077(17) 
N53 0.0274(17) 0.0268(17) 0.0331(18) -0.0085(14) -0.0028(14) -0.0060(14) 
C54 0.028(2) 0.040(2) 0.035(2) -0.0118(18) -0.0043(17) -0.0051(18) 
C55 0.028(2) 0.059(3) 0.072(4) -0.008(3) -0.002(2) -0.015(2) 
C56 0.031(2) 0.046(3) 0.034(2) -0.0099(19) -0.0043(18) -0.0018(19) 
C57 0.035(2) 0.037(2) 0.024(2) -0.0066(17) -0.0064(17) 0.0070(18) 
O58 0.0309(16) 0.0343(16) 0.0433(18) 0.0049(14) -0.0065(14) 0.0015(13) 
C59 0.047(3) 0.051(3) 0.035(2) 0.000(2) -0.010(2) 0.010(2) 
F60 0.056(2) 0.081(3) 0.134(4) 0.032(3) -0.048(3) 0.002(2) 
F61 0.102(3) 0.0420(18) 0.065(2) -0.0028(16) -0.011(2) 0.0129(19) 
F62 0.095(3) 0.077(2) 0.0386(18) 0.0164(17) 0.0009(18) 0.015(2) 
O70 0.0358(16) 0.0204(13) 0.0295(14) -0.0043(11) 0.0016(12) -0.0005(11) 
C71 0.037(2) 0.025(2) 0.040(2) 0.0016(17) 0.0019(19) 0.0017(17) 
C72 0.059(3) 0.026(2) 0.052(3) -0.006(2) 0.003(2) -0.002(2) 
C73 0.064(3) 0.032(2) 0.054(3) -0.015(2) 0.007(3) -0.009(2) 
O74 0.060(2) 0.0279(15) 0.0380(17) -0.0126(13) -0.0046(15) -0.0052(15) 
C75 0.050(3) 0.028(2) 0.049(3) 0.008(2) 0.004(2) 0.000(2) 
F76 0.132(4) 0.062(2) 0.060(2) 0.0053(18) -0.042(2) -0.015(2) 
F77 0.085(3) 0.0378(16) 0.060(2) 0.0087(14) -0.0033(18) 0.0231(16) 
F78 0.083(3) 0.092(3) 0.049(2) 0.0177(19) 0.0237(19) 0.027(2) 
C79 0.118(7) 0.042(3) 0.078(5) -0.032(3) 0.004(5) -0.016(4) 
F80 0.254(8) 0.110(4) 0.123(5) -0.091(4) 0.102(5) -0.079(5) 
F81 0.158(6) 0.178(7) 0.202(8) -0.144(6) 0.025(5) -0.065(5) 
F82 0.521(17) 0.043(3) 0.126(5) -0.039(3) -0.109(8) 0.002(5) 
O90 0.0426(18) 0.0290(15) 0.0340(16) -0.0042(12) 0.0083(14) -0.0030(13) 
C91 0.045(3) 0.037(2) 0.038(2) -0.0097(19) 0.008(2) 0.001(2) 
C92 0.041(3) 0.037(2) 0.052(3) -0.005(2) 0.017(2) -0.001(2) 
C93 0.047(3) 0.037(2) 0.028(2) -0.0063(18) 0.0085(19) -0.007(2) 
O94 0.0341(16) 0.0266(14) 0.0298(15) -0.0050(11) 0.0107(12) -0.0012(12) 
C95 0.040(3) 0.036(2) 0.053(3) -0.004(2) 0.022(2) -0.008(2) 
F96 0.065(2) 0.064(2) 0.099(3) 0.039(2) 0.010(2) -0.0100(19) 
F97 0.125(4) 0.081(3) 0.122(4) 0.013(3) -0.033(3) -0.062(3) 
F98 0.220(7) 0.053(2) 0.185(6) 0.001(3) 0.175(6) -0.012(3) 
C99 0.055(3) 0.042(3) 0.074(4) -0.011(3) 0.014(3) 0.008(3) 
F100 0.081(3) 0.0431(19) 0.116(3) -0.028(2) 0.028(2) 0.0023(18) 
F101 0.119(4) 0.098(3) 0.097(4) -0.017(3) -0.045(3) 0.051(3) 
F102 0.068(3) 0.062(2) 0.182(5) 0.001(3) 0.059(3) 0.013(2) 
O110 0.062(2) 0.0427(18) 0.0249(16) -0.0116(13) 0.0093(15) -0.0047(16) 
C111 0.074(4) 0.054(3) 0.029(2) -0.012(2) 0.003(2) 0.002(3) 
C112 0.075(4) 0.063(4) 0.041(3) -0.025(3) -0.012(3) 0.004(3) 
C113 0.062(3) 0.040(3) 0.035(2) -0.011(2) -0.017(2) 0.003(2) 
O114 0.0460(18) 0.0363(16) 0.0267(15) -0.0107(12) -0.0068(13) -0.0028(14) 
C115 0.114(6) 0.096(6) 0.033(3) -0.025(3) 0.018(4) 0.007(5) 
F116 0.147(5) 0.167(6) 0.073(3) -0.054(3) 0.014(3) 0.061(4) 
F117 0.170(6) 0.151(5) 0.069(3) -0.016(3) 0.060(4) -0.023(5) 
F118 0.143(5) 0.294(10) 0.058(3) -0.097(5) 0.006(3) -0.024(6) 
C119 0.068(4) 0.083(5) 0.056(4) -0.032(3) -0.029(3) -0.001(4) 
F120 0.081(3) 0.146(5) 0.122(4) -0.084(4) -0.057(3) 0.051(3) 
F121 0.083(3) 0.125(4) 0.081(3) -0.057(3) -0.040(2) 0.000(3) 
F122 0.080(3) 0.182(6) 0.085(3) -0.014(4) -0.020(3) -0.061(4) 
N130 0.036(2) 0.037(2) 0.044(2) -0.0221(17) 0.0139(17) -0.0101(16) 
C131 0.048(3) 0.049(3) 0.076(4) -0.028(3) 0.030(3) -0.021(2) 
C132 0.069(5) 0.056(4) 0.145(8) -0.025(4) 0.012(5) -0.038(4) 
C133 0.049(3) 0.049(3) 0.047(3) -0.022(2) 0.008(2) -0.002(2) 
C134 0.054(3) 0.075(4) 0.052(3) -0.025(3) -0.016(3) 0.008(3) 
C135 0.054(3) 0.044(3) 0.051(3) -0.016(2) 0.005(2) -0.007(2) 
C136 0.105(5) 0.041(3) 0.049(3) -0.009(2) 0.006(3) 0.006(3) 

_refine_ls_extinction_method 
    'None'
_oxford_refine_ls_scale 0.2146(3) 
loop_
 _geom_bond_atom_site_label_1
 _geom_bond_site_symmetry_1
 _geom_bond_atom_site_label_2
 _geom_bond_site_symmetry_2
 _geom_bond_distance
 _geom_bond_publ_flag
Y1 . O10 . 2.407(3)    yes
Y1 . O30 . 2.426(3)    yes
Y1 . O50 . 2.441(3)    yes
Y1 . O70 . 2.408(3)    yes
Y1 . O74 . 2.368(3)    yes
Y1 . O90 . 2.360(3)    yes
Y1 . O94 . 2.421(3)    yes
Y1 . O110 . 2.348(3)    yes
Y1 . O114 . 2.373(3)    yes
Cu1 . Cl1 . 2.7973(11)    yes
Cu1 . O10 . 2.004(2)    yes
Cu1 . O30 . 1.980(3)    yes
Cu1 . N33 . 1.944(3)    yes
Cu1 . O38 . 1.905(3)    yes
Cu1 . O94 . 2.613(3)    yes
Cu2 . Cl1 . 2.7463(10)    yes
Cu2 . O10 . 2.008(3)    yes
Cu2 . N13 . 1.943(3)    yes
Cu2 . O18 . 1.904(3)    yes
Cu2 . O50 . 1.994(3)    yes
Cu2 . O70 . 2.658(3)    yes
Cu3 . Cl1 . 2.7449(10)    yes
Cu3 . O30 . 2.007(3)    yes
Cu3 . O50 . 1.971(3)    yes
Cu3 . N53 . 1.943(4)    yes
Cu3 . O58 . 1.898(3)    yes
Cu3 . O114 . 2.849(3)    yes
O10 . C11 . 1.450(5)    yes
C11 . C12 . 1.519(6)    yes
C11 . H111 . 1.004    no
C11 . H112 . 1.006    no
C12 . N13 . 1.459(5)    yes
C12 . H121 . 0.972    no
C12 . H122 . 0.980    no
N13 . C14 . 1.293(5)    yes
C14 . C15 . 1.519(6)    yes
C14 . C16 . 1.432(6)    yes
C15 . H151 . 1.017    no
C15 . H152 . 0.963    no
C15 . H153 . 0.949    no
C16 . C17 . 1.359(6)    yes
C16 . H161 . 0.914    no
C17 . O18 . 1.287(5)    yes
C17 . C19 . 1.536(6)    yes
C19 . F20 . 1.322(6)    yes
C19 . F21 . 1.327(6)    yes
C19 . F22 . 1.322(6)    yes
O30 . C31 . 1.442(4)    yes
C31 . C32 . 1.519(6)    yes
C31 . H311 . 1.077    no
C31 . H312 . 0.989    no
C32 . N33 . 1.478(6)    yes
C32 . H321 . 0.966    no
C32 . H322 . 0.992    no
N33 . C34 . 1.297(6)    yes
C34 . C35 . 1.517(6)    yes
C34 . C36 . 1.432(7)    yes
C35 . H351 . 1.009    no
C35 . H352 . 1.037    no
C35 . H353 . 0.871    no
C36 . C37 . 1.343(6)    yes
C36 . H361 . 0.926    no
C37 . O38 . 1.293(5)    yes
C37 . C39 . 1.530(6)    yes
C39 . F40 . 1.351(6)    yes
C39 . F41 . 1.322(6)    yes
C39 . F42 . 1.331(5)    yes
O50 . C51 . 1.446(5)    yes
C51 . C52 . 1.516(6)    yes
C51 . H511 . 1.085    no
C51 . H512 . 0.957    no
C52 . N53 . 1.465(5)    yes
C52 . H521 . 1.017    no
C52 . H522 . 0.962    no
N53 . C54 . 1.299(5)    yes
C54 . C55 . 1.507(7)    yes
C54 . C56 . 1.440(6)    yes
C55 . H551 . 1.032    no
C55 . H552 . 0.948    no
C55 . H553 . 1.010    no
C56 . C57 . 1.345(7)    yes
C56 . H561 . 0.969    no
C57 . O58 . 1.298(5)    yes
C57 . C59 . 1.522(6)    yes
C59 . F60 . 1.321(6)    yes
C59 . F61 . 1.342(7)    yes
C59 . F62 . 1.317(6)    yes
O70 . C71 . 1.248(5)    yes
C71 . C72 . 1.395(7)    yes
C71 . C75 . 1.516(7)    yes
C72 . C73 . 1.381(8)    yes
C72 . H721 . 0.958    no
C73 . O74 . 1.252(6)    yes
C73 . C79 . 1.527(8)    yes
C75 . F76 . 1.322(7)    yes
C75 . F77 . 1.324(5)    yes
C75 . F78 . 1.330(6)    yes
C79 . F80 . 1.242(9)    yes
C79 . F81 . 1.335(11)    yes
C79 . F82 . 1.241(9)    yes
O90 . C91 . 1.235(6)    yes
C91 . C92 . 1.404(7)    yes
C91 . C99 . 1.537(7)    yes
C92 . C93 . 1.397(7)    yes
C92 . H921 . 0.952    no
C93 . O94 . 1.246(6)    yes
C93 . C95 . 1.537(6)    yes
C95 . F96 . 1.301(6)    yes
C95 . F97 . 1.321(7)    yes
C95 . F98 . 1.263(6)    yes
C99 . F100 . 1.311(7)    yes
C99 . F101 . 1.319(8)    yes
C99 . F102 . 1.319(7)    yes
O110 . C111 . 1.233(7)    yes
C111 . C112 . 1.395(9)    yes
C111 . C115 . 1.525(8)    yes
C112 . C113 . 1.400(8)    yes
C112 . H1121 . 1.091    no
C113 . O114 . 1.256(6)    yes
C113 . C119 . 1.559(9)    yes
C115 . F116 . 1.295(9)    yes
C115 . F117 . 1.335(10)    yes
C115 . F118 . 1.292(9)    yes
C119 . F120 . 1.304(8)    yes
C119 . F121 . 1.325(7)    yes
C119 . F122 . 1.308(9)    yes
N130 . C131 . 1.508(6)    yes
N130 . C133 . 1.523(7)    yes
N130 . C135 . 1.497(7)    yes
N130 . H1301 . 1.030    no
C131 . C132 . 1.501(9)    yes
C131 . H1311 . 1.072    no
C131 . H1312 . 0.959    no
C132 . H1321 . 0.997    no
C132 . H1322 . 1.160    no
C132 . H1323 . 0.842    no
C133 . C134 . 1.502(8)    yes
C133 . H1331 . 1.018    no
C133 . H1332 . 1.011    no
C134 . H1341 . 0.941    no
C134 . H1342 . 0.927    no
C134 . H1343 . 1.014    no
C135 . C136 . 1.517(8)    yes
C135 . H1351 . 1.015    no
C135 . H1352 . 0.955    no
C136 . H1361 . 1.066    no
C136 . H1362 . 1.177    no
C136 . H1363 . 0.872    no
loop_
 _geom_angle_atom_site_label_1
 _geom_angle_site_symmetry_1
 _geom_angle_atom_site_label_2
 _geom_angle_site_symmetry_2
 _geom_angle_atom_site_label_3
 _geom_angle_site_symmetry_3
 _geom_angle
 _geom_angle_publ_flag
O10 . Y1 . O30 . 67.79(9)    yes
O10 . Y1 . O50 . 68.27(9)    yes
O30 . Y1 . O50 . 67.15(9)    yes
O10 . Y1 . O70 . 70.88(9)    yes
O30 . Y1 . O70 . 126.41(9)    yes
O50 . Y1 . O70 . 66.79(9)    yes
O10 . Y1 . O74 . 141.25(10)    yes
O30 . Y1 . O74 . 142.36(11)    yes
O50 . Y1 . O74 . 98.44(11)    yes
O70 . Y1 . O74 . 70.46(10)    yes
O10 . Y1 . O90 . 89.84(10)    yes
O30 . Y1 . O90 . 139.72(10)    yes
O50 . Y1 . O90 . 136.29(10)    yes
O70 . Y1 . O90 . 70.44(10)    yes
O74 . Y1 . O90 . 74.99(12)    yes
O10 . Y1 . O94 . 69.66(9)    yes
O30 . Y1 . O94 . 70.08(9)    yes
O50 . Y1 . O94 . 128.31(9)    yes
O70 . Y1 . O94 . 123.59(10)    yes
O74 . Y1 . O94 . 133.25(11)    yes
O10 . Y1 . O110 . 138.35(11)    yes
O30 . Y1 . O110 . 96.51(10)    yes
O50 . Y1 . O110 . 142.75(11)    yes
O70 . Y1 . O110 . 137.03(11)    yes
O74 . Y1 . O110 . 73.79(12)    yes
O10 . Y1 . O114 . 130.41(10)    yes
O30 . Y1 . O114 . 70.60(10)    yes
O50 . Y1 . O114 . 71.59(10)    yes
O70 . Y1 . O114 . 117.34(11)    yes
O74 . Y1 . O114 . 71.85(11)    yes
O90 . Y1 . O94 . 70.82(10)    yes
O90 . Y1 . O110 . 77.97(12)    yes
O94 . Y1 . O110 . 68.71(11)    yes
O90 . Y1 . O114 . 139.74(11)    yes
O94 . Y1 . O114 . 118.81(11)    yes
O110 . Y1 . O114 . 71.40(12)    yes
Cl1 . Cu1 . O10 . 82.27(8)    yes
Cl1 . Cu1 . O30 . 82.96(8)    yes
O10 . Cu1 . O30 . 85.13(11)    yes
Cl1 . Cu1 . N33 . 104.96(11)    yes
O10 . Cu1 . N33 . 168.18(13)    yes
O30 . Cu1 . N33 . 86.49(13)    yes
Cl1 . Cu1 . O38 . 103.13(10)    yes
O10 . Cu1 . O38 . 93.96(11)    yes
O30 . Cu1 . O38 . 173.69(13)    yes
N33 . Cu1 . O38 . 93.45(14)    yes
Cl1 . Cu1 . O94 . 145.90(7)    yes
O10 . Cu1 . O94 . 71.98(10)    yes
O30 . Cu1 . O94 . 73.12(11)    yes
N33 . Cu1 . O94 . 97.58(12)    yes
O38 . Cu1 . O94 . 100.65(12)    yes
Cl1 . Cu2 . O10 . 83.54(8)    yes
Cl1 . Cu2 . N13 . 100.35(10)    yes
O10 . Cu2 . N13 . 86.03(13)    yes
Cl1 . Cu2 . O18 . 101.91(10)    yes
O10 . Cu2 . O18 . 174.31(12)    yes
N13 . Cu2 . O18 . 94.51(13)    yes
Cl1 . Cu2 . O50 . 85.78(8)    yes
O10 . Cu2 . O50 . 85.65(11)    yes
N13 . Cu2 . O50 . 169.05(13)    yes
O18 . Cu2 . O50 . 93.06(12)    yes
Cl1 . Cu2 . O70 . 145.13(7)    yes
O10 . Cu2 . O70 . 71.98(10)    yes
N13 . Cu2 . O70 . 102.27(12)    yes
O18 . Cu2 . O70 . 102.39(11)    yes
O50 . Cu2 . O70 . 68.31(10)    yes
Cl1 . Cu3 . O30 . 83.88(8)    yes
Cl1 . Cu3 . O50 . 86.25(8)    yes
O30 . Cu3 . O50 . 85.13(11)    yes
Cl1 . Cu3 . N53 . 113.14(11)    yes
O30 . Cu3 . N53 . 160.43(13)    yes
O50 . Cu3 . N53 . 86.39(13)    yes
Cl1 . Cu3 . O58 . 93.29(11)    yes
O30 . Cu3 . O58 . 94.73(13)    yes
O50 . Cu3 . O58 . 179.53(13)    yes
N53 . Cu3 . O58 . 93.88(14)    yes
Cl1 . Cu3 . O114 . 142.45(7)    yes
O30 . Cu3 . O114 . 67.06(10)    yes
O50 . Cu3 . O114 . 68.73(10)    yes
N53 . Cu3 . O114 . 93.42(12)    yes
O58 . Cu3 . O114 . 111.63(12)    yes
Cu3 . Cl1 . Cu2 . 74.32(3)    yes
Cu3 . Cl1 . Cu1 . 75.70(3)    yes
Cu2 . Cl1 . Cu1 . 76.29(3)    yes
Y1 . O10 . Cu2 . 98.76(10)    yes
Y1 . O10 . Cu1 . 97.39(10)    yes
Cu2 . O10 . Cu1 . 117.19(13)    yes
Y1 . O10 . C11 . 120.7(2)    yes
Cu2 . O10 . C11 . 105.2(2)    yes
Cu1 . O10 . C11 . 116.8(2)    yes
O10 . C11 . C12 . 108.9(3)    yes
O10 . C11 . H111 . 106.3    no
C12 . C11 . H111 . 113.9    no
O10 . C11 . H112 . 107.2    no
C12 . C11 . H112 . 113.7    no
H111 . C11 . H112 . 106.4    no
C11 . C12 . N13 . 108.0(3)    yes
C11 . C12 . H121 . 108.0    no
N13 . C12 . H121 . 111.8    no
C11 . C12 . H122 . 107.4    no
N13 . C12 . H122 . 110.9    no
H121 . C12 . H122 . 110.6    no
C12 . N13 . Cu2 . 111.0(2)    yes
C12 . N13 . C14 . 122.1(4)    yes
Cu2 . N13 . C14 . 126.9(3)    yes
N13 . C14 . C15 . 121.1(4)    yes
N13 . C14 . C16 . 121.8(4)    yes
C15 . C14 . C16 . 117.1(4)    yes
C14 . C15 . H151 . 107.3    no
C14 . C15 . H152 . 109.0    no
H151 . C15 . H152 . 108.4    no
C14 . C15 . H153 . 107.7    no
H151 . C15 . H153 . 109.9    no
H152 . C15 . H153 . 114.4    no
C14 . C16 . C17 . 124.4(4)    yes
C14 . C16 . H161 . 117.3    no
C17 . C16 . H161 . 118.0    no
C16 . C17 . O18 . 129.6(4)    yes
C16 . C17 . C19 . 118.3(4)    yes
O18 . C17 . C19 . 112.1(4)    yes
C17 . O18 . Cu2 . 122.7(3)    yes
C17 . C19 . F20 . 112.4(4)    yes
C17 . C19 . F21 . 113.5(4)    yes
F20 . C19 . F21 . 105.9(4)    yes
C17 . C19 . F22 . 109.9(4)    yes
F20 . C19 . F22 . 107.3(4)    yes
F21 . C19 . F22 . 107.4(4)    yes
Y1 . O30 . Cu3 . 99.68(10)    yes
Y1 . O30 . Cu1 . 97.47(11)    yes
Cu3 . O30 . Cu1 . 117.08(13)    yes
Y1 . O30 . C31 . 119.8(2)    yes
Cu3 . O30 . C31 . 115.2(2)    yes
Cu1 . O30 . C31 . 106.8(2)    yes
O30 . C31 . C32 . 109.0(3)    yes
O30 . C31 . H311 . 108.6    no
C32 . C31 . H311 . 111.3    no
O30 . C31 . H312 . 111.7    no
C32 . C31 . H312 . 113.5    no
H311 . C31 . H312 . 102.5    no
C31 . C32 . N33 . 107.1(3)    yes
C31 . C32 . H321 . 108.1    no
N33 . C32 . H321 . 112.2    no
C31 . C32 . H322 . 107.0    no
N33 . C32 . H322 . 111.8    no
H321 . C32 . H322 . 110.5    no
C32 . N33 . Cu1 . 109.9(2)    yes
C32 . N33 . C34 . 122.3(3)    yes
Cu1 . N33 . C34 . 127.7(3)    yes
N33 . C34 . C35 . 120.8(4)    yes
N33 . C34 . C36 . 121.3(4)    yes
C35 . C34 . C36 . 117.8(4)    yes
C34 . C35 . H351 . 105.6    no
C34 . C35 . H352 . 101.2    no
H351 . C35 . H352 . 104.3    no
C34 . C35 . H353 . 108.1    no
H351 . C35 . H353 . 120.6    no
H352 . C35 . H353 . 115.0    no
C34 . C36 . C37 . 123.8(4)    yes
C34 . C36 . H361 . 122.0    no
C37 . C36 . H361 . 114.1    no
C36 . C37 . O38 . 130.2(4)    yes
C36 . C37 . C39 . 119.2(4)    yes
O38 . C37 . C39 . 110.5(4)    yes
C37 . O38 . Cu1 . 122.4(3)    yes
C37 . C39 . F40 . 111.2(4)    yes
C37 . C39 . F41 . 112.5(4)    yes
F40 . C39 . F41 . 106.0(4)    yes
C37 . C39 . F42 . 113.4(4)    yes
F40 . C39 . F42 . 105.7(4)    yes
F41 . C39 . F42 . 107.6(4)    yes
Y1 . O50 . Cu2 . 98.04(11)    yes
Y1 . O50 . Cu3 . 100.19(10)    yes
Cu2 . O50 . Cu3 . 113.52(12)    yes
Y1 . O50 . C51 . 117.3(2)    yes
Cu2 . O50 . C51 . 117.8(2)    yes
Cu3 . O50 . C51 . 108.5(2)    yes
O50 . C51 . C52 . 109.2(3)    yes
O50 . C51 . H511 . 109.2    no
C52 . C51 . H511 . 107.7    no
O50 . C51 . H512 . 111.1    no
C52 . C51 . H512 . 114.2    no
H511 . C51 . H512 . 105.4    no
C51 . C52 . N53 . 108.6(3)    yes
C51 . C52 . H521 . 108.1    no
N53 . C52 . H521 . 110.3    no
C51 . C52 . H522 . 106.1    no
N53 . C52 . H522 . 111.9    no
H521 . C52 . H522 . 111.5    no
C52 . N53 . Cu3 . 110.3(3)    yes
C52 . N53 . C54 . 123.3(4)    yes
Cu3 . N53 . C54 . 126.1(3)    yes
N53 . C54 . C55 . 121.3(4)    yes
N53 . C54 . C56 . 121.7(4)    yes
C55 . C54 . C56 . 116.9(4)    yes
C54 . C55 . H551 . 108.0    no
C54 . C55 . H552 . 114.1    no
H551 . C55 . H552 . 110.0    no
C54 . C55 . H553 . 108.4    no
H551 . C55 . H553 . 103.6    no
H552 . C55 . H553 . 112.1    no
C54 . C56 . C57 . 124.0(4)    yes
C54 . C56 . H561 . 114.4    no
C57 . C56 . H561 . 121.4    no
C56 . C57 . O58 . 129.6(4)    yes
C56 . C57 . C59 . 120.2(4)    yes
O58 . C57 . C59 . 110.3(4)    yes
C57 . O58 . Cu3 . 122.4(3)    yes
C57 . C59 . F60 . 113.8(5)    yes
C57 . C59 . F61 . 111.4(4)    yes
F60 . C59 . F61 . 106.3(5)    yes
C57 . C59 . F62 . 112.1(4)    yes
F60 . C59 . F62 . 108.4(4)    yes
F61 . C59 . F62 . 104.2(5)    yes
Y1 . O70 . Cu2 . 83.00(8)    yes
Y1 . O70 . C71 . 134.4(3)    yes
Cu2 . O70 . C71 . 140.9(3)    yes
O70 . C71 . C72 . 127.4(4)    yes
O70 . C71 . C75 . 114.7(4)    yes
C72 . C71 . C75 . 117.8(4)    yes
C71 . C72 . C73 . 120.3(4)    yes
C71 . C72 . H721 . 131.4    no
C73 . C72 . H721 . 107.3    no
C72 . C73 . O74 . 128.2(5)    yes
C72 . C73 . C79 . 117.5(5)    yes
O74 . C73 . C79 . 114.4(5)    yes
Y1 . O74 . C73 . 134.5(3)    yes
C71 . C75 . F76 . 112.3(4)    yes
C71 . C75 . F77 . 114.9(5)    yes
F76 . C75 . F77 . 107.2(5)    yes
C71 . C75 . F78 . 111.0(4)    yes
F76 . C75 . F78 . 103.4(5)    yes
F77 . C75 . F78 . 107.3(4)    yes
C73 . C79 . F80 . 114.8(6)    yes
C73 . C79 . F81 . 110.1(6)    yes
F80 . C79 . F81 . 99.1(8)    yes
C73 . C79 . F82 . 115.6(7)    yes
F80 . C79 . F82 . 112.8(8)    yes
F81 . C79 . F82 . 102.3(9)    yes
Y1 . O90 . C91 . 135.6(3)    yes
O90 . C91 . C92 . 128.5(4)    yes
O90 . C91 . C99 . 113.3(4)    yes
C92 . C91 . C99 . 118.2(5)    yes
C91 . C92 . C93 . 119.1(4)    yes
C91 . C92 . H921 . 121.1    no
C93 . C92 . H921 . 119.7    no
C92 . C93 . O94 . 128.8(4)    yes
C92 . C93 . C95 . 116.3(4)    yes
O94 . C93 . C95 . 114.9(4)    yes
Y1 . O94 . Cu1 . 82.56(9)    yes
Y1 . O94 . C93 . 132.4(3)    yes
Cu1 . O94 . C93 . 139.5(3)    yes
C93 . C95 . F96 . 113.2(4)    yes
C93 . C95 . F97 . 109.8(5)    yes
F96 . C95 . F97 . 101.6(5)    yes
C93 . C95 . F98 . 114.6(4)    yes
F96 . C95 . F98 . 109.7(6)    yes
F97 . C95 . F98 . 107.0(6)    yes
C91 . C99 . F100 . 111.8(5)    yes
C91 . C99 . F101 . 110.3(5)    yes
F100 . C99 . F101 . 107.3(6)    yes
C91 . C99 . F102 . 113.2(5)    yes
F100 . C99 . F102 . 106.7(5)    yes
F101 . C99 . F102 . 107.2(6)    yes
Y1 . O110 . C111 . 136.0(4)    yes
O110 . C111 . C112 . 126.8(5)    yes
O110 . C111 . C115 . 114.2(6)    yes
C112 . C111 . C115 . 119.0(6)    yes
C111 . C112 . C113 . 120.5(5)    yes
C111 . C112 . H1121 . 123.6    no
C113 . C112 . H1121 . 115.9    no
C112 . C113 . O114 . 127.7(5)    yes
C112 . C113 . C119 . 120.1(5)    yes
O114 . C113 . C119 . 112.1(5)    yes
Y1 . O114 . C113 . 133.4(3)    yes
Y1 . O114 . Cu3 . 80.64(8)    yes
C113 . O114 . Cu3 . 141.9(3)    yes
C111 . C115 . F116 . 111.2(6)    yes
C111 . C115 . F117 . 110.5(6)    yes
F116 . C115 . F117 . 105.5(8)    yes
C111 . C115 . F118 . 114.7(8)    yes
F116 . C115 . F118 . 108.5(7)    yes
F117 . C115 . F118 . 106.0(7)    yes
C113 . C119 . F120 . 109.2(6)    yes
C113 . C119 . F121 . 111.9(6)    yes
F120 . C119 . F121 . 107.6(5)    yes
C113 . C119 . F122 . 110.6(5)    yes
F120 . C119 . F122 . 107.5(7)    yes
F121 . C119 . F122 . 109.9(6)    yes
C131 . N130 . C133 . 113.6(4)    yes
C131 . N130 . C135 . 114.3(4)    yes
C133 . N130 . C135 . 111.3(4)    yes
C131 . N130 . H1301 . 108.4    no
C133 . N130 . H1301 . 109.2    no
C135 . N130 . H1301 . 98.9    no
N130 . C131 . C132 . 113.9(5)    yes
N130 . C131 . H1311 . 105.1    no
C132 . C131 . H1311 . 117.5    no
N130 . C131 . H1312 . 104.7    no
C132 . C131 . H1312 . 109.1    no
H1311 . C131 . H1312 . 105.6    no
C131 . C132 . H1321 . 108.4    no
C131 . C132 . H1322 . 100.7    no
H1321 . C132 . H1322 . 96.3    no
C131 . C132 . H1323 . 118.1    no
H1321 . C132 . H1323 . 121.8    no
H1322 . C132 . H1323 . 106.9    no
N130 . C133 . C134 . 112.1(4)    yes
N130 . C133 . H1331 . 105.8    no
C134 . C133 . H1331 . 111.1    no
N130 . C133 . H1332 . 105.3    no
C134 . C133 . H1332 . 115.4    no
H1331 . C133 . H1332 . 106.5    no
C133 . C134 . H1341 . 103.0    no
C133 . C134 . H1342 . 104.8    no
H1341 . C134 . H1342 . 121.9    no
C133 . C134 . H1343 . 99.6    no
H1341 . C134 . H1343 . 110.6    no
H1342 . C134 . H1343 . 113.6    no
N130 . C135 . C136 . 112.1(5)    yes
N130 . C135 . H1351 . 110.2    no
C136 . C135 . H1351 . 109.1    no
N130 . C135 . H1352 . 112.4    no
C136 . C135 . H1352 . 102.3    no
H1351 . C135 . H1352 . 110.4    no
C135 . C136 . H1361 . 113.3    no
C135 . C136 . H1362 . 107.5    no
H1361 . C136 . H1362 . 91.3    no
C135 . C136 . H1363 . 123.6    no
H1361 . C136 . H1363 . 112.0    no
H1362 . C136 . H1363 . 103.3    no
